# Supplementary material
Source: publisher site journal article supplement (https://www.dovepress.com/article/419094)
Supplement: Supplementary file 1 [file get_supplementary_file.php]

Supplementary Table 1. Analysis of Hardy-Weinberg equilibrium of the polymorphisms in SPARC gene

| SNP | group | genotype | | | χ2 | P |
| --- | --- | --- | --- | --- | --- | --- |
|  |  | 11 | 12 | 22 |  |  |
| rs3776959 | case | 132 | 402 | 234 | 3.312 | 0.069 |
|  | control | 140 | 402 | 226 | 2.780 | 0.095 |
| rs4958279 | case | 110 | 391 | 267 | 3.013 | 0.083 |
|  | control | 108 | 382 | 278 | 1.628 | 0.202 |
| rs7733793 | case | 130 | 388 | 250 | 0.979 | 0.323 |
|  | control | 127 | 400 | 241 | 3.258 | 0.071 |
| rs2881558 | case | 148 | 350 | 270 | 3.239 | 0.072 |
|  | control | 106 | 376 | 286 | 1.001 | 0.317 |
| rs2347128 | case | 154 | 356 | 258 | 2.374 | 0.123 |
|  | control | 162 | 378 | 228 | 0.053 | 0.818 |
| rs4958485 | case | 52 | 312 | 404 | 0.627 | 0.429 |
|  | control | 70 | 339 | 359 | 0.621 | 0.431 |
| rs17112187 | case | 29 | 205 | 534 | 2.719 | 0.099 |
|  | control | 8 | 176 | 584 | 1.742 | 0.187 |
| rs4958487 | case | 7 | 91 | 670 | 3.736 | 0.053 |
|  | control | 14 | 140 | 614 | 3.178 | 0.075 |
| rs1545030 | case | 53 | 259 | 456 | 3.681 | 0.055 |
|  | control | 30 | 256 | 482 | 0.306 | 0.580 |

Nine SNPs of SPARC were genotyped in the 768 patients and 768 controls matched for age and gender. The distribution of the nine SPARC SNPs was in accordance with the Hardy-Weinberg equilibrium (HWE), (P>0.05).

SNP=single nucleotide polymorphism; for rs3776959,1=C allele, 2=G allele; for rs4958279, 1=A allele, 2=G allele; for rs7733793, 1=C allele, 2=T allele; for rs2881558, 1=A allele, 2=G allele; for rs2347128, 1=G allele, 2=C allele; for rs4958485, 1=T allele, 2=C allele; for rs17112187, 1=A allele, 2=C allele; for rs4958487, 1=G allele, 2=A allele; for rs1545030 , 1=C allele, 2=T allele.

Supplementary Figure 1. Linkage disequilibrium (LD) structure of the SNPs and haplotype blocks.


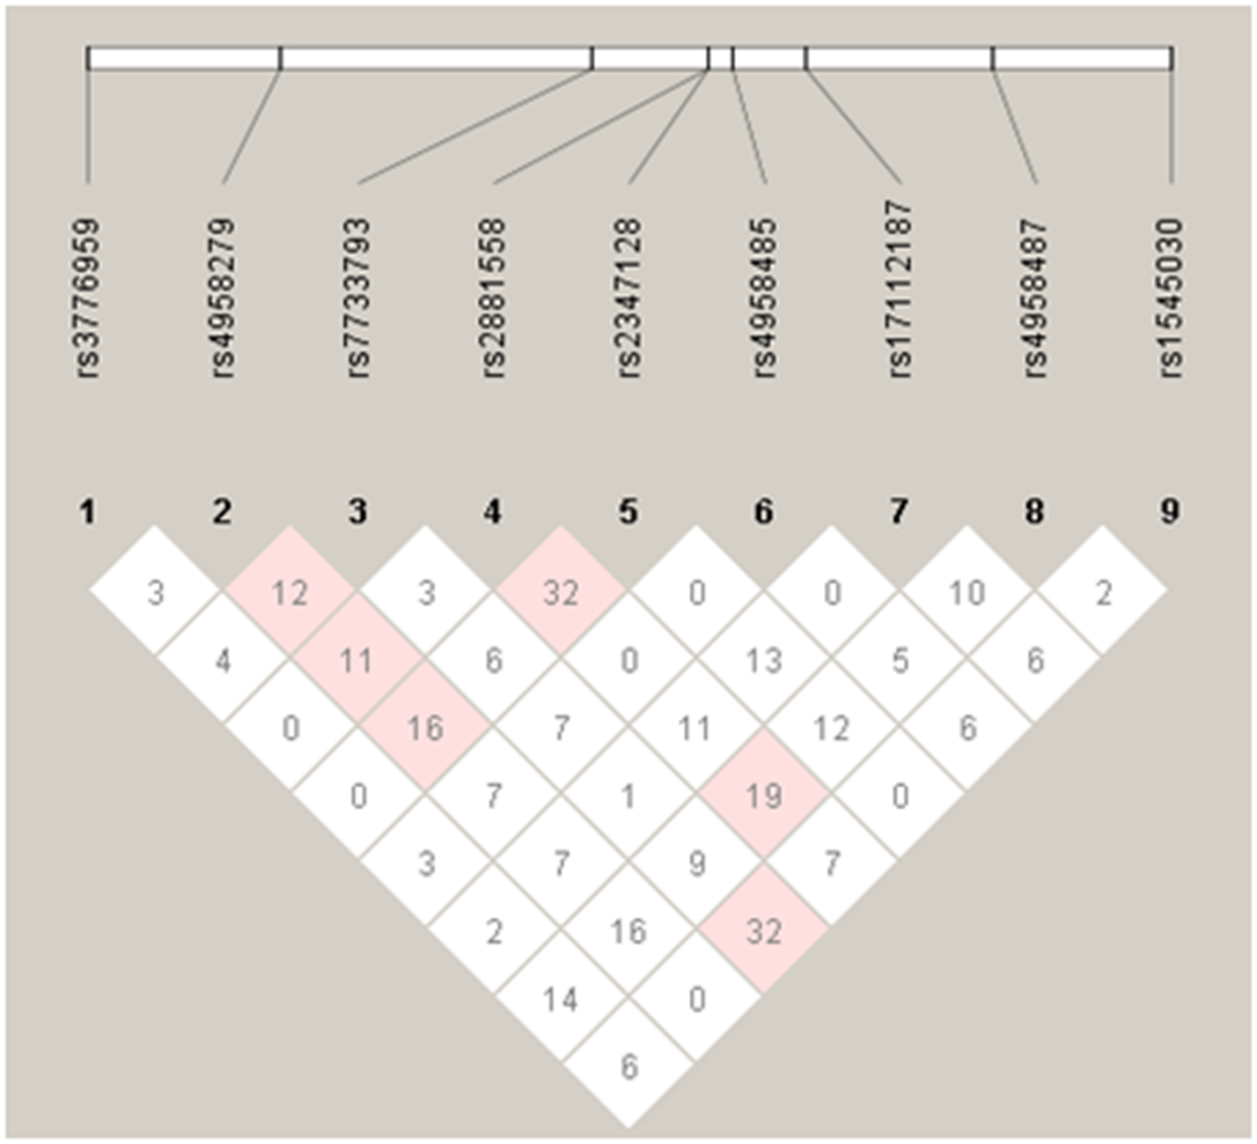


All the nine SNPs haplotypes were compared between AS patients and healthy controls but all of them were in weak linkage disequilibrium.
